# Supplementary material for: Mapping Polyclonal HIV-1 Antibody Responses via Next-Generation Neutralization Fingerprinting
Source: PubMed Central journal article supplement (PMC5241146; doi:10.1371/journal.ppat.1006148), 2017-01-04

Figure S10

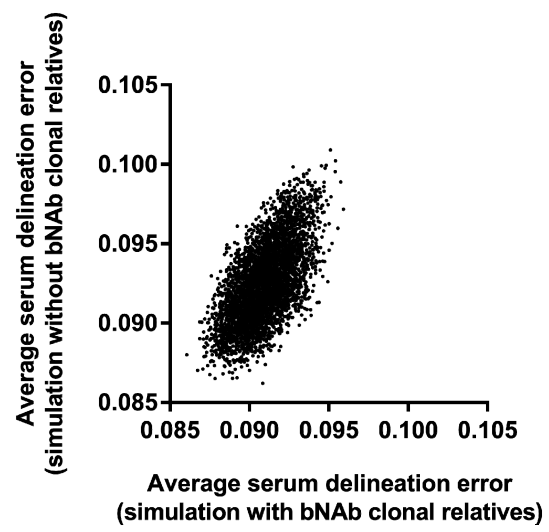

Supplement: ppat.1006148.s010.pdf [file ppat.1006148.s010.pdf]
