# Supplementary material for: Mapping Polyclonal HIV-1 Antibody Responses via Next-Generation Neutralization Fingerprinting
Source: PLOS journal article supplement (doi:10.1371/journal.ppat.1006148), 2017-01-04

Figure S1

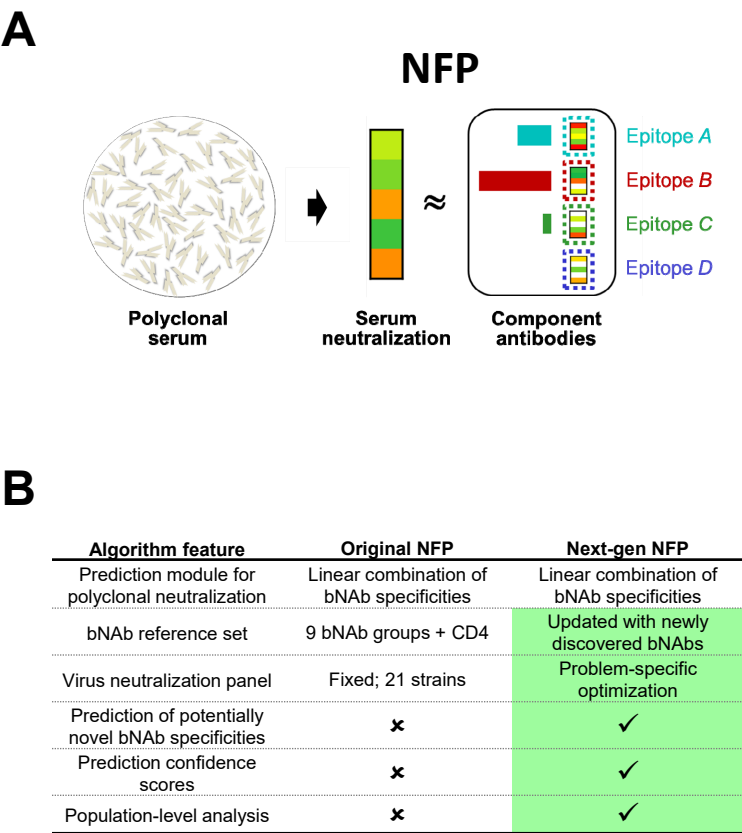

Supplement: S1 (10.1371/journal.ppat.1006148.s001) [file journal.ppat.1006148.s001]
